# Supplementary material for: Do randomized clinical trials with inadequate blinding report enhanced placebo effects for intervention groups and nocebo effects for placebo groups?
Source: PubMed Central journal article supplement (PMC3939643; doi:10.1186/2046-4053-3-14), 2014-02-21
Supplement: 2046-4053-3-14-S2.pdf [file 2046-4053-3-14-S2.pdf]

**Characteristics of 110 included randomised clinical trials.** Study ID with 2 digits represents a study from previous dataset [11].

| Study ID | Publication year | Countries                              | ED population                  | Sample size | Random sequence generation | Allocation concealment | Blinding participants | Blinding caregiver | Blinding outcome assessor | Methods monitoring AEs            | ITT | % randomized and analyzed | Naïve to intervention? | % Naïve to intervention |
|----------|------------------|----------------------------------------|--------------------------------|-------------|----------------------------|------------------------|-----------------------|--------------------|---------------------------|-----------------------------------|-----|---------------------------|------------------------|-------------------------|
| SIL001   | 2009             | Brazil, Korea, Russia, Spain, Sweden   | Broad spectrum                 | 188         | Unclear                    | Unclear                | Unclear               | Unclear            | Unclear                   | Spontaneous reporting             | No  | 96.9                      | Unclear                | ?                       |
| SIL002   | 2006             | Australia, Brazil, Japan, Mexico       | Other                          | 282         | Unclear                    | Unclear                | Low                   | Low                | Low                       | Unclear                           | No  | 93.7                      | Unclear                | ?                       |
| SIL003   | 2006             | USA                                    | Broad spectrum                 | 227         | Unclear                    | Unclear                | Low                   | Low                | Low                       | Unclear                           | No  | 88.7                      | Unclear                | ?                       |
| SIL004   | 2006             | US, Germany, UK, Canada                | Depression                     | 142         | Unclear                    | Unclear                | Unclear               | Unclear            | Unclear                   | Spontaneous reporting             | No  | ?                         | Unclear                | ?                       |
| SIL006   | 2006             | Israel                                 | Post Traumatic Stress Syndrome | 21          | Unclear                    | Unclear                | Unclear               | Unclear            | Unclear                   | Unclear                           | No  | 76.8                      | Unclear                | ?                       |
| SIL007   | 2006             | India                                  | Renal failure                  | 32          | Unclear                    | Low                    | Low                   | Unclear            | Unclear                   | Unclear                           | Yes | 100                       | Unclear                | ?                       |
| SIL009   | 2007             | Thailand, Malaysia, Singapore          | Metabolic syndrome             | 151         | Unclear                    | Unclear                | Unclear               | Unclear            | Unclear                   | Prospective or routine monitoring | No  | 97.6                      | Unclear                | ?                       |
| SIL011   | 2007             | USA                                    | Broad spectrum                 | 155         | Unclear                    | Unclear                | Low                   | Low                | Low                       | Unclear                           | No  | 86.4                      | Unclear                | ?                       |
| SIL014   | 2007             | USA                                    | Broad spectrum                 | 351         | Unclear                    | Unclear                | Low                   | Unclear            | Unclear                   | Unclear                           | No  | 95.1                      | Unclear                | ?                       |
| SIL016   | 2008             | ? US                                   | Broad spectrum                 | 202         | Unclear                    | Unclear                | Unclear               | Unclear            | Unclear                   | Spontaneous reporting             | No  | 96.7                      | Unclear                | ?                       |
| SIL017   | 2008             | Brazil, Italy, Germany, Poland, Turkey | Broad spectrum                 | 294         | Unclear                    | Unclear                | Low                   | Unclear            | Unclear                   | Spontaneous reporting             | No  | 95.8                      | Unclear                | ?                       |
| SIL018   | 2007             | Unclear                                | Broad spectrum                 | 346         | Unclear                    | Unclear                | Unclear               | Unclear            | Unclear                   | Unclear                           | No  | 98.6                      | Unclear                | ?                       |

|         |      |                                                                       |                                |     |         |         |         |         |         |                                   |         |      |         |     |
|---------|------|-----------------------------------------------------------------------|--------------------------------|-----|---------|---------|---------|---------|---------|-----------------------------------|---------|------|---------|-----|
| SIL022  | 2009 | Spain, Russia, Finland, France, Italy, Poland, Sweden, United Kingdom | Broad spectrum                 | 817 | Unclear | Unclear | Low     | Unclear | Unclear | Prospective or routine monitoring | No      | 96.1 | Unclear | ?   |
| SIL023  | 2009 | Iran, possibly others                                                 | Post Traumatic Stress Syndrome | 266 | Unclear | Unclear | Low     | Low     | Unclear | Spontaneous reporting             | Yes     | 100  | Unclear | ?   |
| SIL024  | 2009 | Unclear                                                               | Multiple sclerosis             | 180 | Unclear | Unclear | Low     | Low     | Unclear | Spontaneous reporting             | No      | 88.7 | Yes     | 100 |
| SIL025  | 2009 | Israel                                                                | Broad spectrum                 | 53  | Unclear | Unclear | Low     | Unclear | Unclear | Unclear                           | No      | 88.8 | Unclear | ?   |
| SIL026  | 2010 | Canada                                                                | Broad spectrum                 | 162 | Unclear | Unclear | Low     | Low     | Low     | Spontaneous reporting             | No      | ?    | Unclear | ?   |
| SIL027  | 2010 | Iran                                                                  | Renal failure                  | 27  | Low     | Unclear | Low     | Unclear | Low     | Systematic survey of patients     | Unclear | ?    | Unclear | ?   |
| SIL028  | 2010 | New Zealand                                                           | Prostatic cancer               | 45  | Low     | Low     | Low     | Unclear | Low     | Unclear                           | No      | 72   | Unclear | ?   |
| SIL030  | 2010 | Unclear                                                               | Other                          | 266 | Unclear | Unclear | Low     | Unclear | Unclear | Unclear                           | No      | 87.2 | Unclear | ?   |
| SIL031  | 2010 | Unclear                                                               | Broad spectrum                 | 194 | Unclear | Unclear | Unclear | Unclear | Unclear | Unclear                           | Unclear | ?    | Unclear | ?   |
| SIL034  | 2011 | ? Canada                                                              | Depression                     | 185 | Unclear | Unclear | Unclear | Unclear | Unclear | Unclear                           | No      | 91.5 | Unclear | ?   |
| SIL035a | 2008 | US                                                                    | Broad spectrum                 | 346 | Unclear | Unclear | Low     | Unclear | Unclear | Unclear                           | No      | 98.6 | Unclear | ?   |
| SIL035b | 2008 | US                                                                    | Broad spectrum                 | 246 | Unclear | Unclear | Low     | Unclear | Unclear | Unclear                           | No      | 98.4 | Unclear | ?   |
| SIL13   | 1999 | Denmark, Ireland, Italy, Norway, Sweden, UK                           | Broad spectrum                 | 237 | Unclear | Unclear | Low     | Unclear | Unclear | Spontaneous reporting             | No      | 93.3 | Unclear | ?   |

|       |      |                                               |                        |     |         |         |         |         |         |                                           |         |      |         |     |
|-------|------|-----------------------------------------------|------------------------|-----|---------|---------|---------|---------|---------|-------------------------------------------|---------|------|---------|-----|
| SIL15 | 2002 | Brazil                                        | Renal failure          | 41  | Low     | Low     | Low     | Low     | Low     | Unclear                                   | No      | 85.4 | Unclear | ?   |
| SIL16 | 2003 | ? USA                                         | Broad spectrum         | 223 | Unclear | Unclear | Low     | Unclear | Unclear | Unclear                                   | No      | 97.8 | No      | 0   |
| SIL1b | 2004 | ? Canada                                      | Cardiovascular disease | 17  | Unclear | Unclear | High    | Unclear | Unclear | Unclear                                   | Unclear | ?    | Unclear | ?   |
| SIL1g | 2004 | Unclear                                       | Broad spectrum         | 59  | Unclear | Unclear | Unclear | Unclear | Unclear | Prospective or routine monitoring         | Unclear | ?    | Unclear | ?   |
| SIL25 | 2000 | Japan                                         | Broad spectrum         | 118 | Unclear | Unclear | Unclear | Unclear | Unclear | Unclear                                   | No      | 90.2 | Unclear | ?   |
| SIL2a | 2001 | Unclear                                       | Prostatic cancer       | 60  | Unclear | Unclear | Unclear | Unclear | Unclear | Patient checklist, questionnaire or diary | Yes     | 100  | Yes     | 100 |
| SIL2f | 2004 | Unclear                                       | Renal failure          | 13  | Unclear | Unclear | Unclear | Unclear | Unclear | Unclear                                   | Unclear | ?    | Unclear | ?   |
| SIL31 | 1998 | USA                                           | Broad spectrum         | 270 | Unclear | Unclear | Unclear | Unclear | Unclear | Unclear                                   | No      | 82.1 | Unclear | ?   |
| SIL34 | 2000 | Malaysia, the Philippines, Singapore          | Broad spectrum         | 246 | Low     | High    | Low     | Low     | Low     | Unclear                                   | No      | 96.9 | Unclear | ?   |
| SIL35 | 2001 | Taiwan                                        | Broad spectrum         | 220 | Unclear | Unclear | Low     | Unclear | Unclear | Unclear                                   | No      | ?    | Unclear | ?   |
| SIL36 | 2001 | Denmark, Finland, France, Germany, Sweden, UK | Diabetes               | 196 | Unclear | Unclear | Low     | Unclear | Unclear | Unclear                                   | No      | 89.1 | Unclear | ?   |
| SIL37 | 2000 | Belgium, France, Germany, Netherlands, UK     | Broad spectrum         | 273 | Unclear | Unclear | Low     | Unclear | Unclear | Prospective or routine monitoring         | No      | 86.6 | Unclear | ?   |
| SIL38 | 2001 | USA                                           | Broad spectrum         | 239 | Unclear | Unclear | Unclear | Unclear | Unclear | Unclear                                   | No      | 96.8 | Unclear | ?   |
| SIL39 | 2001 | USA                                           | Depression             | 136 | Low     | Low     | Low     | Low     | Low     | Unclear                                   | No      | 89.5 | Unclear | ?   |

|        |      |                                                                      |                        |     |         |         |         |         |         |                                     |    |      |         |     |
|--------|------|----------------------------------------------------------------------|------------------------|-----|---------|---------|---------|---------|---------|-------------------------------------|----|------|---------|-----|
| SIL40  | 2002 | Argentina, Chile, Peru, Uruguay                                      | Broad spectrum         | 131 | Unclear | Unclear | Unclear | Unclear | Unclear | Unclear                             | No | ?    | Unclear | ?   |
| SIL41a | 2002 | USA                                                                  | Broad spectrum         | 232 | Unclear | Unclear | Low     | Unclear | Unclear | Unclear                             | No | 94.3 | Yes     | 100 |
| SIL41b | 2002 | USA                                                                  | Broad spectrum         | 178 | Unclear | Unclear | Low     | Unclear | Unclear | Unclear                             | No | 90.4 | Yes     | 100 |
| SIL42  | 2001 | Brazil, Mexico                                                       | Broad spectrum         | 214 | Unclear | Unclear | Low     | Unclear | Unclear | Unclear                             | No | 87.3 | Unclear | ?   |
| SIL43  | 2002 | Colombia, Ecuador, Venezuela                                         | Broad spectrum         | 146 | Unclear | Unclear | Low     | Unclear | Unclear | Unclear                             | No | 91.8 | Unclear | ?   |
| SIL44  | 2002 | ? UK                                                                 | Other                  | 32  | Low     | Low     | Low     | Unclear | Unclear | Unclear                             | No | ?    | Unclear | ?   |
| SIL46  | 2003 | Thailand                                                             | Broad spectrum         | 124 | Unclear | Unclear | Low     | Unclear | Unclear | Prospective or routine monitoring   | No | ?    | Unclear | ?   |
| SIL47  | 2003 | Egypt, South Africa                                                  | Broad spectrum         | 248 | Unclear | Unclear | Unclear | Unclear | Unclear | Prospective or routine monitoring   | No | 97.6 | Unclear | ?   |
| SIL48  | 2001 | Argentina, Australia, Brazil, Canada, Italy, Spain, Thailand, Turkey | Diabetes               | 167 | Low     | Low     | Low     | Unclear | Unclear | Unclear                             | No | 87.4 | Unclear | ?   |
| SIL49  | 2003 | Korea                                                                | Broad spectrum         | 131 | Unclear | Unclear | Low     | Unclear | Unclear | Prospective or routine monitoring   | No | ?    | Unclear | ?   |
| SIL50  | 2002 | Belgium, France, Germany, Italy, Spain                               | Depression             | 156 | Low     | Low     | Low     | Low     | Low     | Unclear                             | No | 92.9 | Unclear | ?   |
| SIL51  | 2004 | USA                                                                  | Cardiovascular disease | 142 | Low     | Unclear | Unclear | Unclear | Unclear | Unclear                             | No | 94   | Yes     | 100 |
| SIL53  | 2005 | Brazil                                                               | Cardiovascular disease | 87  | Low     | Unclear | Low     | Unclear | Unclear | Patient checklist, questionnaire or | No | 72.5 | Unclear | ?   |

| Study ID | Year | Country                                             | Condition              | n   | Quality | Study Design | Setting | Intervention | Comparator | Outcome Measure                           | Follow-up | Effect Size | Confidence | Notes |
|----------|------|-----------------------------------------------------|------------------------|-----|---------|--------------|---------|--------------|------------|-------------------------------------------|-----------|-------------|------------|-------|
| SIL57    | 2005 | USA, Canada                                         | Cardiovascular disease | 130 | Low     | Unclear      | Unclear | Unclear      | Unclear    | Unclear                                   | No        | 94.9        | Unclear    | ?     |
| SIL68    | 2002 | Spain                                               | Diabetes               | 80  | Unclear | Unclear      | Unclear | Unclear      | Unclear    | Unclear                                   | No        | 86.8        | Unclear    | ?     |
| SIL69    | 2001 | China                                               | Broad spectrum         | 619 | Unclear | Unclear      | Unclear | Unclear      | Unclear    | Unclear                                   | No        | ?           | Unclear    | ?     |
| TAD001   | 2006 | Korea                                               | Broad spectrum         | 121 | Unclear | Unclear      | Unclear | Unclear      | Unclear    | Prospective or routine monitoring         | No        | ?           | Unclear    | ?     |
| TAD003   | 2006 | The Netherlands                                     | Prostatic cancer       | 60  | Unclear | Unclear      | Low     | Unclear      | Unclear    | Patient checklist, questionnaire or diary | Yes       | 100         | Unclear    | ?     |
| TAD004   | 2006 | Japan                                               | Broad spectrum         | 172 | Unclear | Unclear      | Low     | Low          | Low        | Spontaneous reporting                     | No        | ?           | Unclear    | ?     |
| TAD005   | 2006 | Argentina, Brazil, France, Germany, United Kingdom. | Broad spectrum         | 159 | Low     | Low          | Unclear | Unclear      | Unclear    | Spontaneous reporting                     | No        | ?           | Unclear    | ?     |
| TAD006   | 2006 | Egypt, Turkey                                       | Broad spectrum         | 124 | Unclear | Unclear      | Unclear | Unclear      | Unclear    | Prospective or routine monitoring         | No        | 92.7        | Unclear    | ?     |
| TAD007   | 2006 | China, Indonesia, Malaysia, Philippines, Singapore  | Broad spectrum         | 242 | Unclear | Unclear      | Unclear | Unclear      | Unclear    | Prospective or routine monitoring         | No        | ?           | Unclear    | ?     |
| TAD008   | 2007 | USA                                                 | Broad spectrum         | 189 | Low     | Unclear      | Unclear | Unclear      | Unclear    | Unclear                                   | No        | 99          | Unclear    | ?     |
| TAD009   | 2007 | North America, Europe, Australia                    | Diabetes               | 195 | Unclear | Low          | Unclear | Unclear      | Unclear    | Spontaneous reporting                     | No        | 98.5        | Unclear    | ?     |
| TAD01    | 2005 | Canada                                              | Broad spectrum         | 141 | Unclear | Unclear      | Low     | Low          | Low        | Prospective or routine monitoring         | No        | 94.5        | No         | 34    |

|        |      |                                                                                   |                    |     |         |         |         |         |         |                                   |         |      |         |      |
|--------|------|-----------------------------------------------------------------------------------|--------------------|-----|---------|---------|---------|---------|---------|-----------------------------------|---------|------|---------|------|
| TAD010 | 2007 | France, Germany, Italy, Spain.                                                    | Spinal cord injury | 184 | Low     | Unclear | Unclear | Unclear | Unclear | Spontaneous reporting             | No      | ?    | No      | 21   |
| TAD012 | 2009 | Austria, France, Germany, Mexico, USA                                             | Broad spectrum     | 316 | Low     | Unclear | Low     | Unclear | Unclear | Unclear                           | No      | 92.4 | Unclear | ?    |
| TAD015 | 2011 | Germany, Greece, Italy, Poland, Spain.                                            | Broad spectrum     | 213 | Unclear | Low     | Low     | Unclear | Unclear | Unclear                           | No      | 97.5 | Yes     | 100  |
| TAD018 | 2012 | USA, Canada, France, Germany, Greece, Italy, Mexico, Portugal, Russian Federation | Prostatic cancer   | 393 | Low     | Low     | Low     | Low     | Low     | Unclear                           | No      | 96.3 | No      | 72.3 |
| TAD02  | 2000 | Canada                                                                            | Broad spectrum     | 155 | Unclear | Unclear | Unclear | Unclear | Unclear | Unclear                           | Unclear | ?    | Unclear | ?    |
| TAD03  | 2002 | Spain                                                                             | Diabetes           | 143 | Unclear | Unclear | Unclear | Unclear | Unclear | Unclear                           | Unclear | ?    | Unclear | ?    |
| TAD04  | 2001 | Taiwan                                                                            | Broad spectrum     | 130 | Low     | Unclear | Unclear | Unclear | Unclear | Unclear                           | No      | ?    | No      | 46.5 |
| TAD05  | 2005 | Australia                                                                         | Broad spectrum     | 133 | Low     | Unclear | Low     | Unclear | Unclear | Unclear                           | No      | 95.7 | Unclear | ?    |
| TAD06  | 2000 | Argentina, Canada, Mexico                                                         | Broad spectrum     | 143 | Unclear | Unclear | Unclear | Unclear | Unclear | Unclear                           | Unclear | ?    | Unclear | ?    |
| TAD07  | 2005 | USA                                                                               | Broad spectrum     | 183 | Unclear | Unclear | Unclear | Unclear | Unclear | Prospective or routine monitoring | No      | 93.9 | No      | 17   |
| TAD08  | 2004 | USA, Puerto Rico                                                                  | Broad spectrum     | 205 | Unclear | Unclear | Low     | Low     | Low     | Unclear                           | No      | ?    | No      | 19   |
| TAD09  | 2004 | UK, Italy                                                                         | Broad spectrum     | 215 | Unclear | Low     | Unclear | Unclear | Unclear | Prospective or routine monitoring | No      | ?    | No      | 51.4 |
| TAD10  | 2004 | Czech Republic, Poland, Slovakia, Israel, Hungary,                                | Broad spectrum     | 403 | Unclear | Unclear | Unclear | Unclear | Unclear | Prospective or routine monitoring | No      | 98.4 | No      | 46.4 |

|        |      |                                                                                                           |                    |     |         |         |         |         |         |                                   |                                   |         |         |         |   |
|--------|------|-----------------------------------------------------------------------------------------------------------|--------------------|-----|---------|---------|---------|---------|---------|-----------------------------------|-----------------------------------|---------|---------|---------|---|
|        |      | Lebanon, Romania                                                                                          |                    |     |         |         |         |         |         |                                   |                                   |         |         |         |   |
| TAD11  | 2006 | China, Singapore, Philippines                                                                             | Broad spectrum     | 247 | Unclear | Unclear | Unclear | Unclear | Unclear | Unclear                           | Prospective or routine monitoring | Unclear | ?       | Unclear | ? |
| TAD13  | 2004 | Canada                                                                                                    | Broad spectrum     | 83  | Unclear | Unclear | Low     | Unclear | Unclear | Unclear                           | Unclear                           | Unclear | ?       | Unclear | ? |
| TAD16  | 2004 | Canada, Germany, Italy, The Netherlands, Spain, UK, USA                                                   | Prostatic cancer   | 293 | Low     | Unclear | Low     | Low     | Low     | Prospective or routine monitoring | No                                | 96.3    | Unclear | ?       |   |
| TAD18  | 2001 | Unclear                                                                                                   | Broad spectrum     | 71  | Unclear | Unclear | Unclear | Unclear | Unclear | Unclear                           | Yes                               | 100     | Unclear | ?       |   |
| TAD21  | 2006 | Unclear                                                                                                   | Diabetes           | 198 | Unclear | Unclear | Unclear | Unclear | Unclear | Unclear                           | Unclear                           | ?       | Unclear | ?       |   |
| VAR001 | 2006 | Unclear                                                                                                   | Broad spectrum     | 254 | Unclear | Unclear | Unclear | Unclear | Unclear | Unclear                           | No                                | 97.5    | Yes     | 100     |   |
| VAR002 | 2006 | USA, Canada, Portugal, Italy, Spain, France, Australia, Hong Kong, Mexico.                                | Spinal cord injury | 394 | Unclear | Unclear | Unclear | Unclear | Unclear | Unclear                           | No                                | ?       | Unclear | ?       |   |
| VAR003 | 2006 | Japan                                                                                                     | Diabetes           | 441 | Unclear | Low     | Low     | Unclear | Unclear | Unclear                           | No                                | 97      | Unclear | ?       |   |
| VAR004 | 2006 | USA, Germany, Canada, Australia, Austria, Brazil, Greece, South Korea, Mexico, Sweden, Singapore, Turkey. | Broad spectrum     | 364 | Unclear | Unclear | Unclear | Unclear | Unclear | Unclear                           | No                                | 95      | Unclear | ?       |   |
| VAR005 | 2006 | USA, Canada, France, Spain, Italy.                                                                        | Depression         | 260 | Unclear | Unclear | Unclear | Unclear | Unclear | Unclear                           | No                                | 92.9    | Unclear | ?       |   |
| VAR006 | 2006 | Germany                                                                                                   | Diabetes           | 302 | Unclear | Unclear | Low     | Unclear | Unclear | Unclear                           | No                                | 95      | Yes     | 100     |   |

|        |      |                                                                             |                    |     |         |         |         |         |         |                                   |         |      |         |      |
|--------|------|-----------------------------------------------------------------------------|--------------------|-----|---------|---------|---------|---------|---------|-----------------------------------|---------|------|---------|------|
| VAR007 | 2007 | Spain                                                                       | Broad spectrum     | 121 | Unclear | Unclear | Low     | Low     | Low     | Unclear                           | No      | 93.8 | Unclear | ?    |
| VAR008 | 2007 | UK                                                                          | Broad spectrum     | 432 | Unclear | Unclear | Unclear | Unclear | Unclear | Unclear                           | No      | 62.2 | Unclear | ?    |
| VAR009 | 2008 | Malaysia, Singapore, Thailand, the Philippines, Hong Kong, China, Indonesia | Broad spectrum     | 334 | Unclear | Unclear | Unclear | Unclear | Unclear | Unclear                           | No      | 94.3 | No      | 36   |
| VAR01  | 2003 | USA, Canada                                                                 | Prostatic cancer   | 284 | Low     | Unclear | Low     | Unclear | Unclear | Unclear                           | No      | 96.6 | No      | 20   |
| VAR011 | 2008 | USA                                                                         | Metabolic syndrome | 385 | Unclear | Low     | Unclear | Unclear | Unclear | Unclear                           | No      | ?    | No      | 20   |
| VAR015 | 2009 | Italy                                                                       | Broad spectrum     | 46  | Unclear | Unclear | Unclear | Unclear | Unclear | Unclear                           | Unclear | ?    | Yes     | 100  |
| VAR017 | 2009 | Unclear                                                                     | Broad spectrum     | 175 | Unclear | Unclear | Unclear | Unclear | Unclear | Unclear                           | No      | 87.1 | Unclear | ?    |
| VAR018 | 2010 | Belgium, France, Germany, the Netherlands, Spain, South Africa              | Broad spectrum     | 355 | Unclear | Unclear | Low     | Unclear | Unclear | Prospective or routine monitoring | No      | 98.1 | No      | 23.5 |
| VAR019 | 2010 | Australia, Canada, Mexico, USA                                              | Broad spectrum     | 327 | Unclear | Unclear | Low     | Unclear | Unclear | Prospective or routine monitoring | No      | 96.5 | No      | 16.9 |
| VAR02  | 2002 | USA, Canada                                                                 | Broad spectrum     | 373 | Unclear | Unclear | Unclear | Unclear | Unclear | Unclear                           | No      | 94.7 | No      | 33   |
| VAR020 | 2010 | Unclear                                                                     | Multiple sclerosis | 21  | Unclear | Unclear | Unclear | Unclear | Unclear | Unclear                           | Unclear | ?    | Unclear | ?    |
| VAR021 | 2011 | Germany                                                                     | Metabolic syndrome | 144 | Unclear | Unclear | Low     | Unclear | Unclear | Prospective or routine monitoring | No      | 96   | No      | 32   |
| VAR04  | 2004 | Japan                                                                       | Broad spectrum     | 137 | Unclear | Low     | Low     | Unclear | Unclear | Unclear                           | No      | 98.6 | Unclear | ?    |
| VAR05  | 2004 | Austria, France, Germany, Greece,                                           | Broad spectrum     | 304 | Unclear | Unclear | Low     | Unclear | Unclear | Spontaneous                       | No      | 94.2 | No      | 48   |



|       |      |                                                                         |                        |     |         |         |         |         |         |                                           |           |      |         |      |  |
|-------|------|-------------------------------------------------------------------------|------------------------|-----|---------|---------|---------|---------|---------|-------------------------------------------|-----------|------|---------|------|--|
|       |      | Italy, Netherlands, Spain, Switzerland, UK                              |                        |     |         |         |         |         |         |                                           | reporting |      |         |      |  |
| VAR07 | 2004 | North America, Europe, Asia-Pacific                                     | Broad spectrum         | 452 | Unclear | Unclear | Low     | Unclear | Unclear | Prospective or routine monitoring         | No        | 97.6 | No      | 0    |  |
| VAR09 | 2001 | Belgium, France, Germany, Netherlands, Poland, Rep of South Africa, USA | Broad spectrum         | 294 | Unclear | Unclear | Low     | Unclear | Unclear | Patient checklist, questionnaire or diary | No        | ?    | No      | 51   |  |
| VAR10 | 2003 | USA, Canada                                                             | Diabetes               | 277 | Unclear | Unclear | Unclear | Unclear | Unclear | Prospective or routine monitoring         | No        | 92.6 | No      | 42.5 |  |
| VAR11 | 2004 | North America and Europe                                                | Broad spectrum         | 476 | Low     | Low     | Low     | Low     | Low     | Prospective or routine monitoring         | No        | 96.2 | No      | 27.5 |  |
| VAR12 | 2005 | Europe, North America, South America, Asia-Pacific                      | Broad spectrum         | 509 | Unclear | Unclear | Unclear | Unclear | Unclear | Unclear                                   | No        | 97.3 | No      | 12   |  |
| VAR14 | 2005 | ? Canada, USA                                                           | Broad spectrum         | 225 | Low     | Unclear | Low     | Unclear | Unclear | Unclear                                   | No        | 98.3 | No      | 14   |  |
| VAR15 | 2005 | Germany                                                                 | Cardiovascular disease | 354 | Unclear | Unclear | Low     | Unclear | Unclear | Unclear                                   | No        | 91.2 | Unclear | ?    |  |
| VAR19 | 2006 | Unclear                                                                 | Unclear                | 383 | Unclear | Unclear | Unclear | Unclear | Unclear | Unclear                                   | Unclear   | ?    | Unclear | ?    |  |
