# Supplementary material for: Do randomized clinical trials with inadequate blinding report enhanced placebo effects for intervention groups and nocebo effects for placebo groups?
Source: PubMed Central journal article supplement (PMC3939643; doi:10.1186/2046-4053-3-14), 2014-02-21
Supplement: 2046-4053-3-14-S5.pdf [file 2046-4053-3-14-S5.pdf]

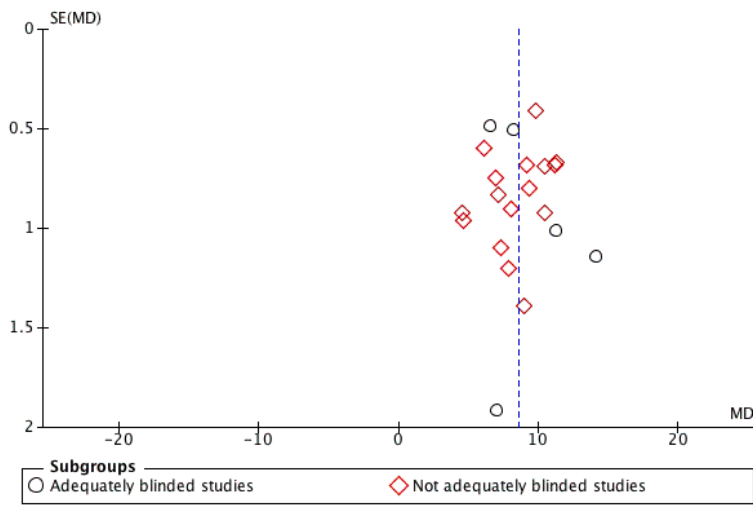

Funnel plot of comparison: 1 IIEF-EF change scores: blinding across 4 RoB domains, outcome: 1.2 Effect estimate intervention groups.

Figure 4 (Analysis 6.1)

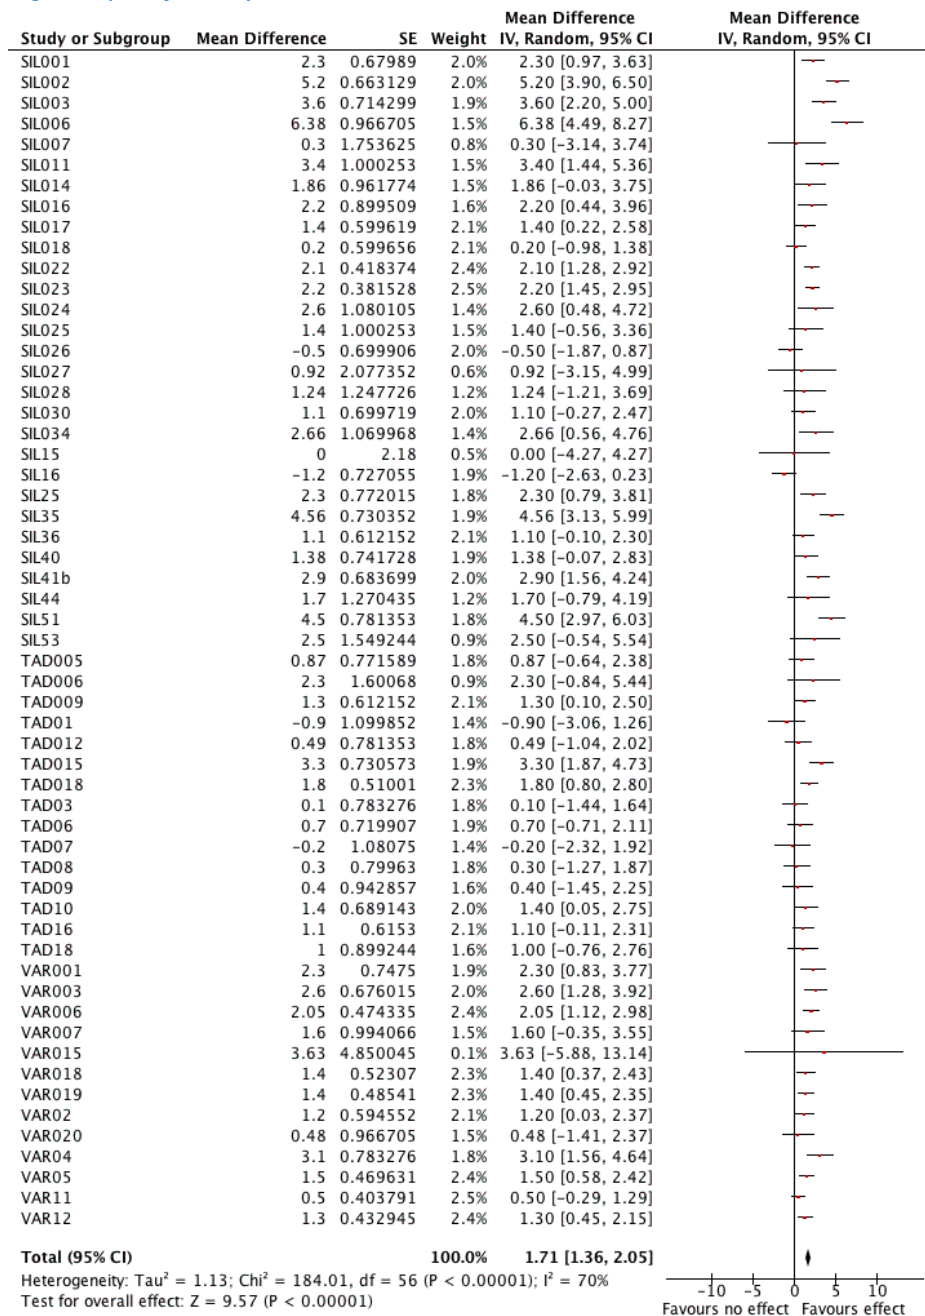

Forest plot of comparison: 6 IIEF-EF change scores: RCTs using parallel and crossover design, outcome: 6.1 Effect estimate placebo groups.

Figure 5 (Analysis 6.2)

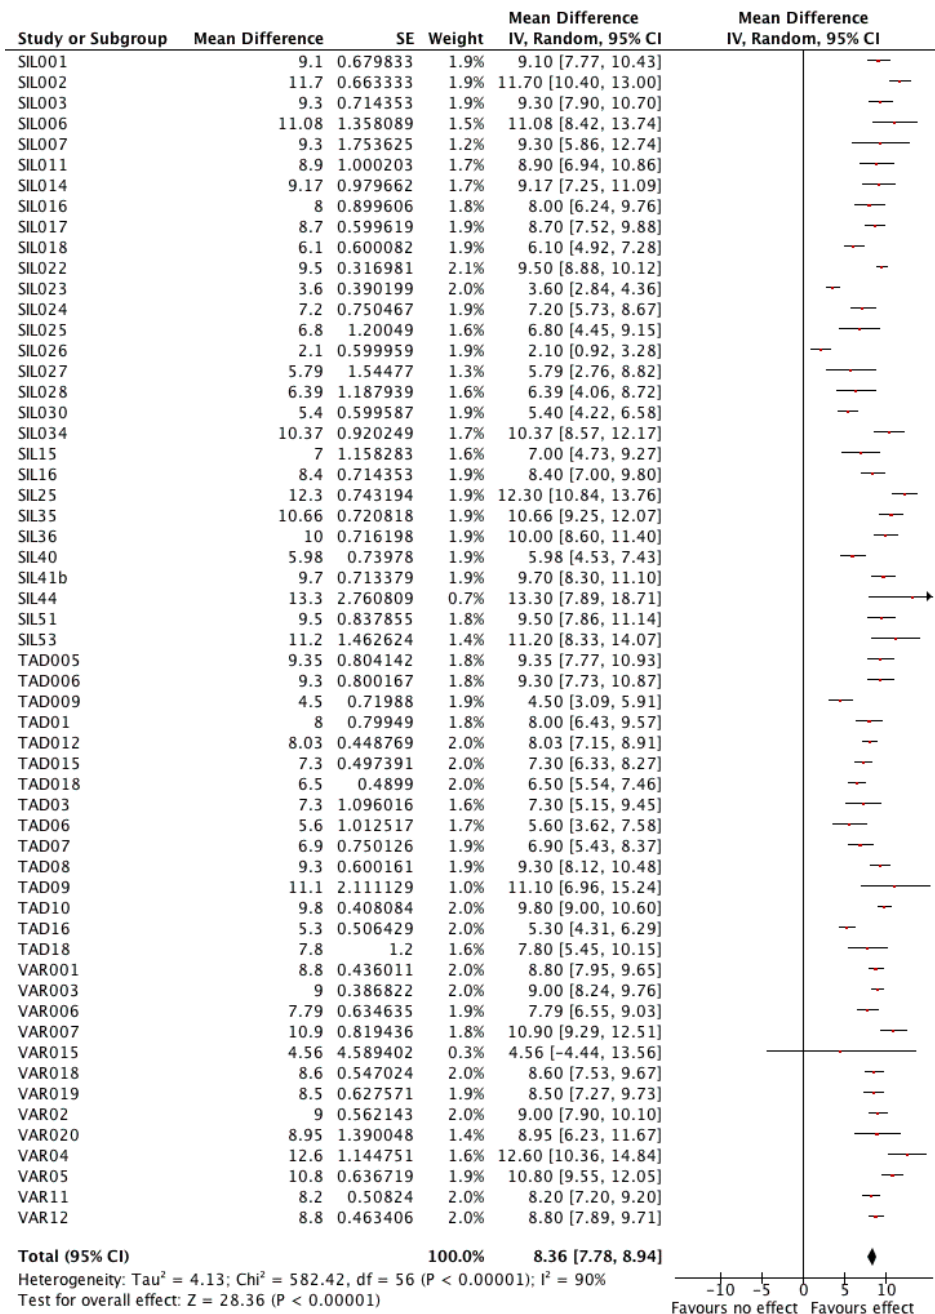

Forest plot of comparison: 6 IIEF-EF change scores: RCTs using parallel and crossover design, outcome: 6.2 Effect estimate intervention groups.

Figure 6 (Analysis 7.1)

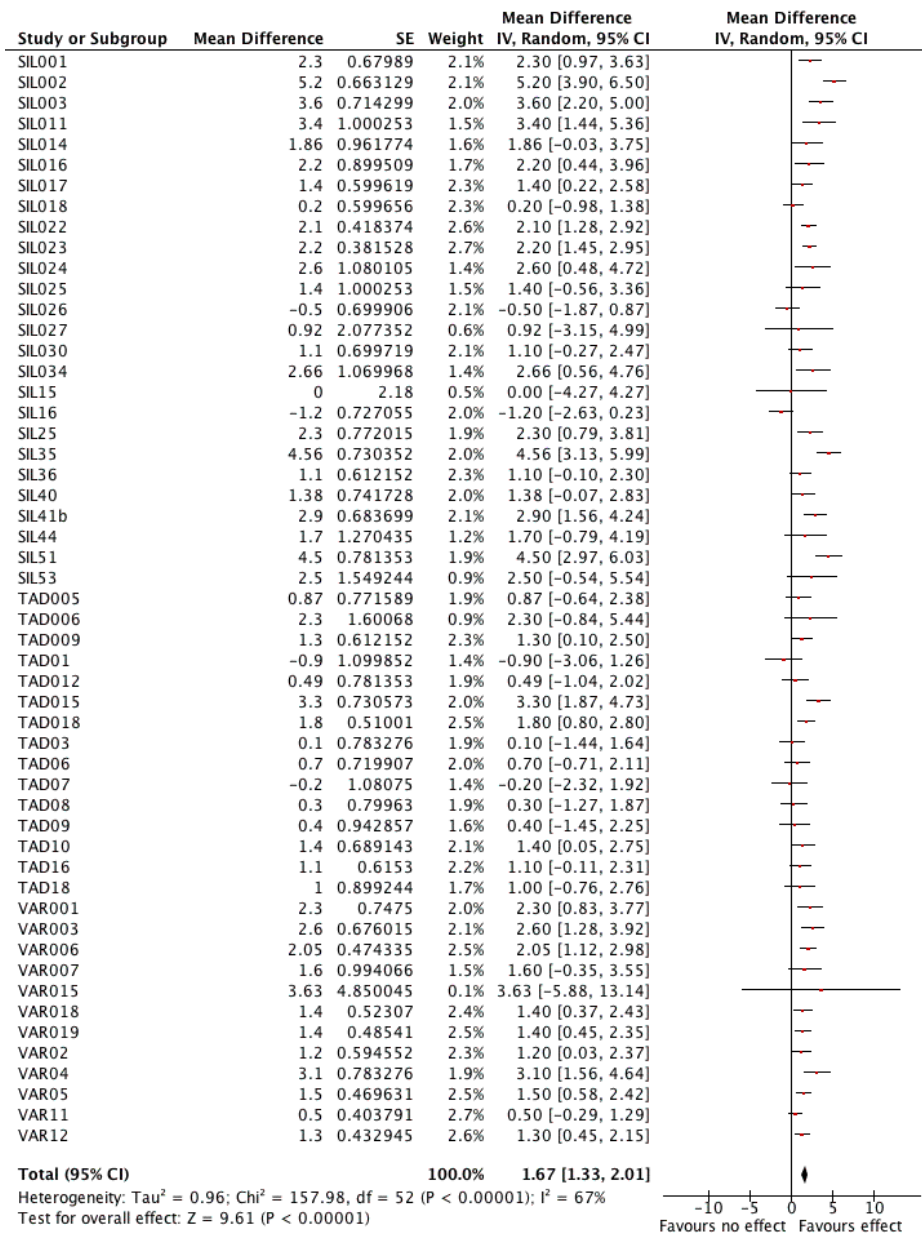

Forest plot of comparison: 7 IIEF-EF change scores: RCTs using parallel design, outcome: 7.1 Effect estimate placebo groups.

Figure 7 (Analysis 7.2)

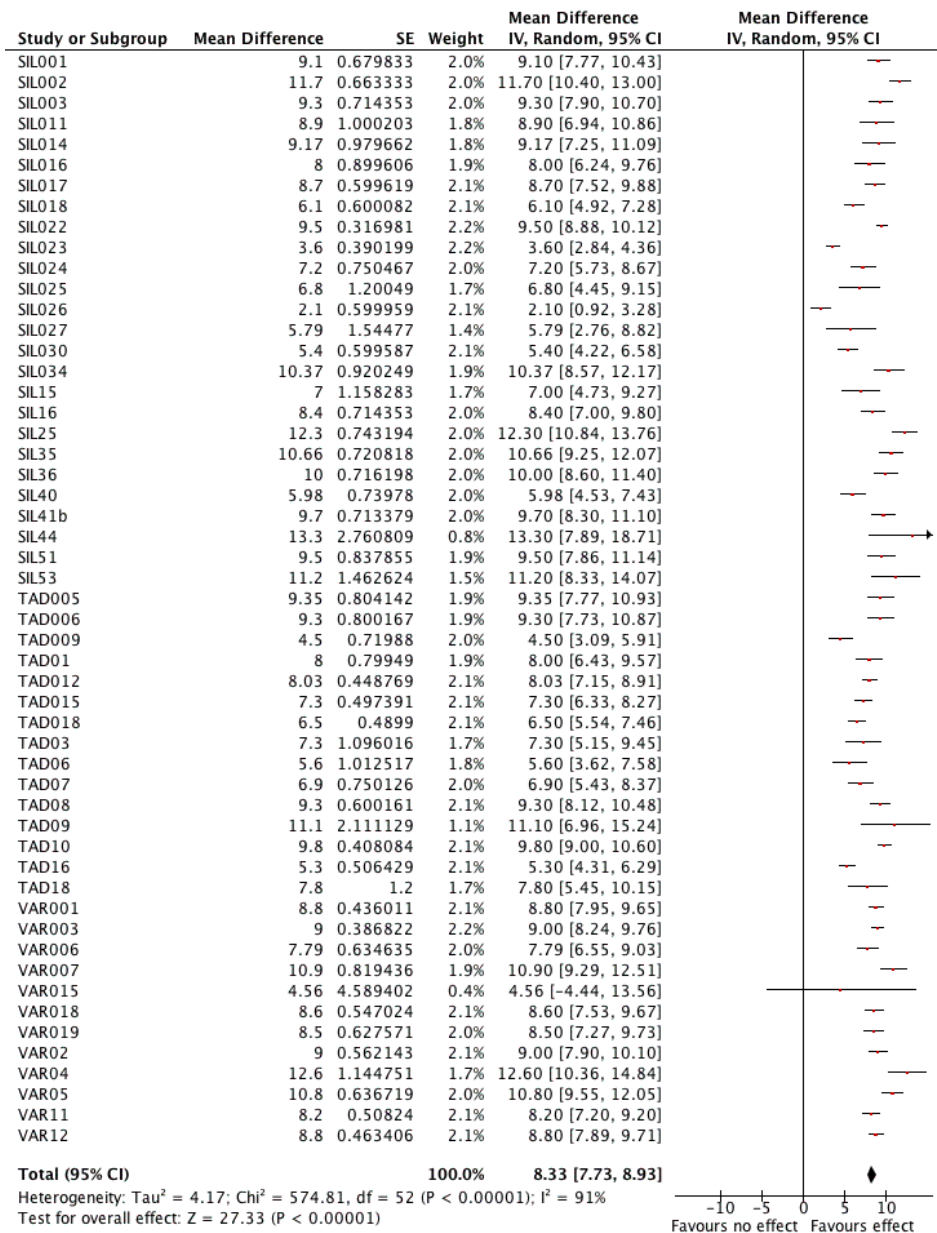

Forest plot of comparison: 7 IIEF-EF change scores: RCTs using parallel design, outcome: 7.2 Effect estimate intervention groups.

**Figure 8 (Analysis 8.1)**

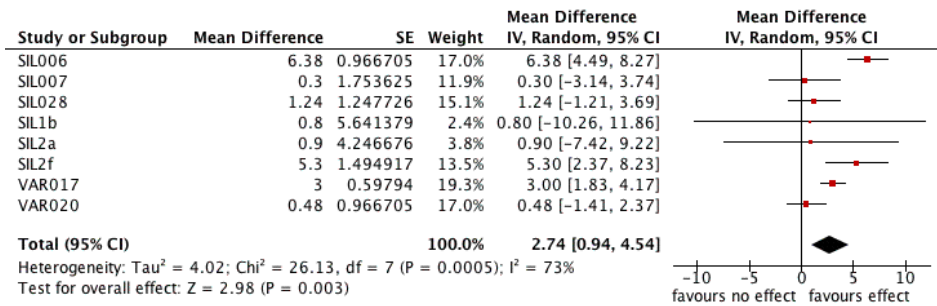

Forest plot of comparison: 8 IIEF-EF change scores: RCTs using crossover design, outcome: 8.1 Effect estimate placebo groups.

**Figure 9 (Analysis 8.2)**

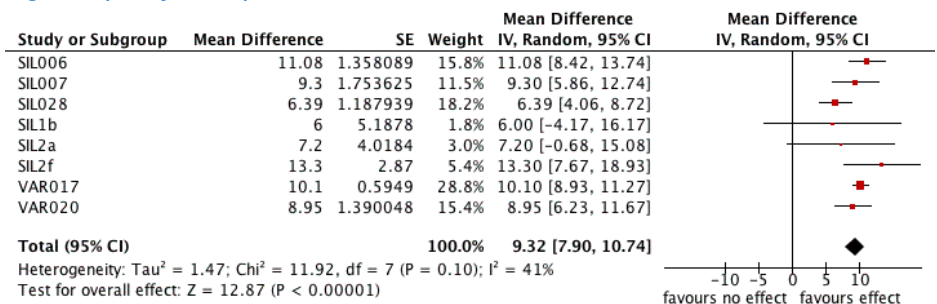

Forest plot of comparison: 8 IIEF-EF change scores: RCTs using crossover design, outcome: 8.2 Effect estimate intervention groups.

Figure 10 (Analysis 9.1)

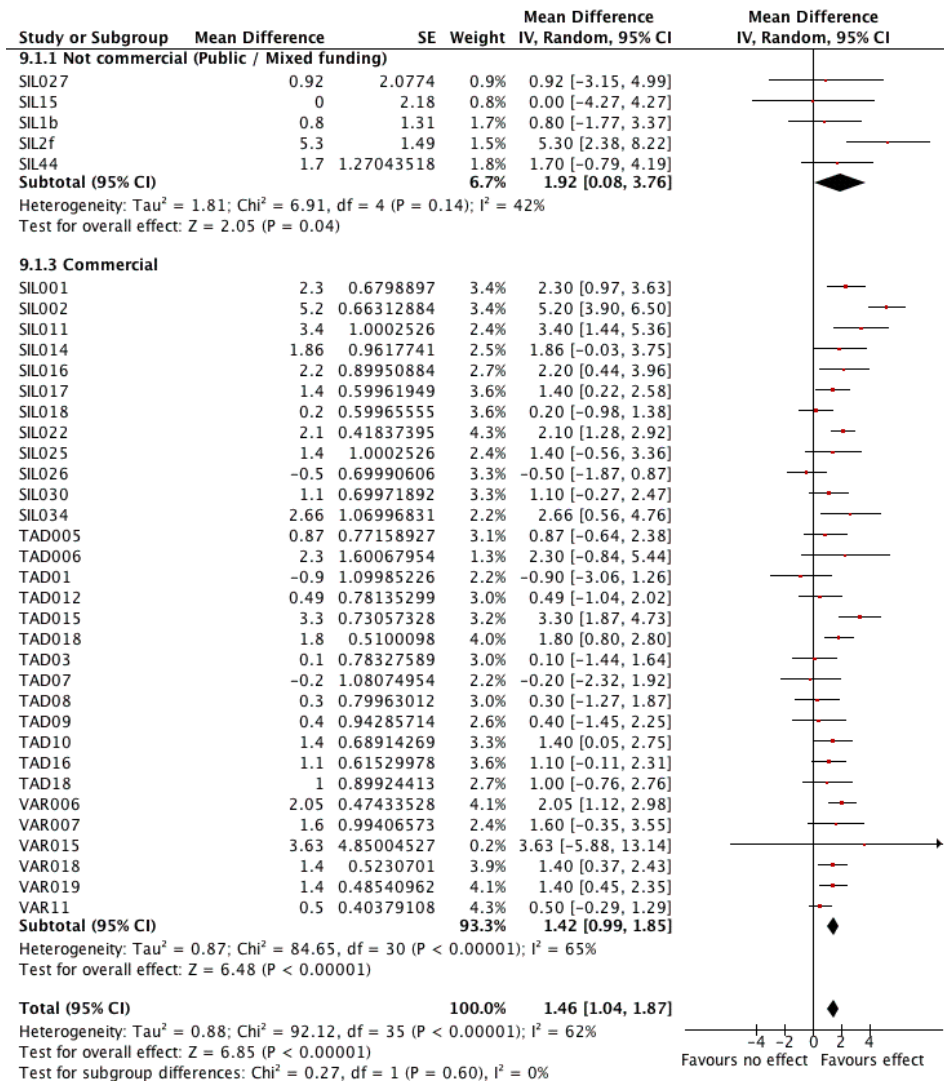

Forest plot of comparison: 9 IIEF-EF change scores: Commercial Funding, outcome: 9.1 Effect estimate placebo groups.

Figure 11 (Analysis 9.2)

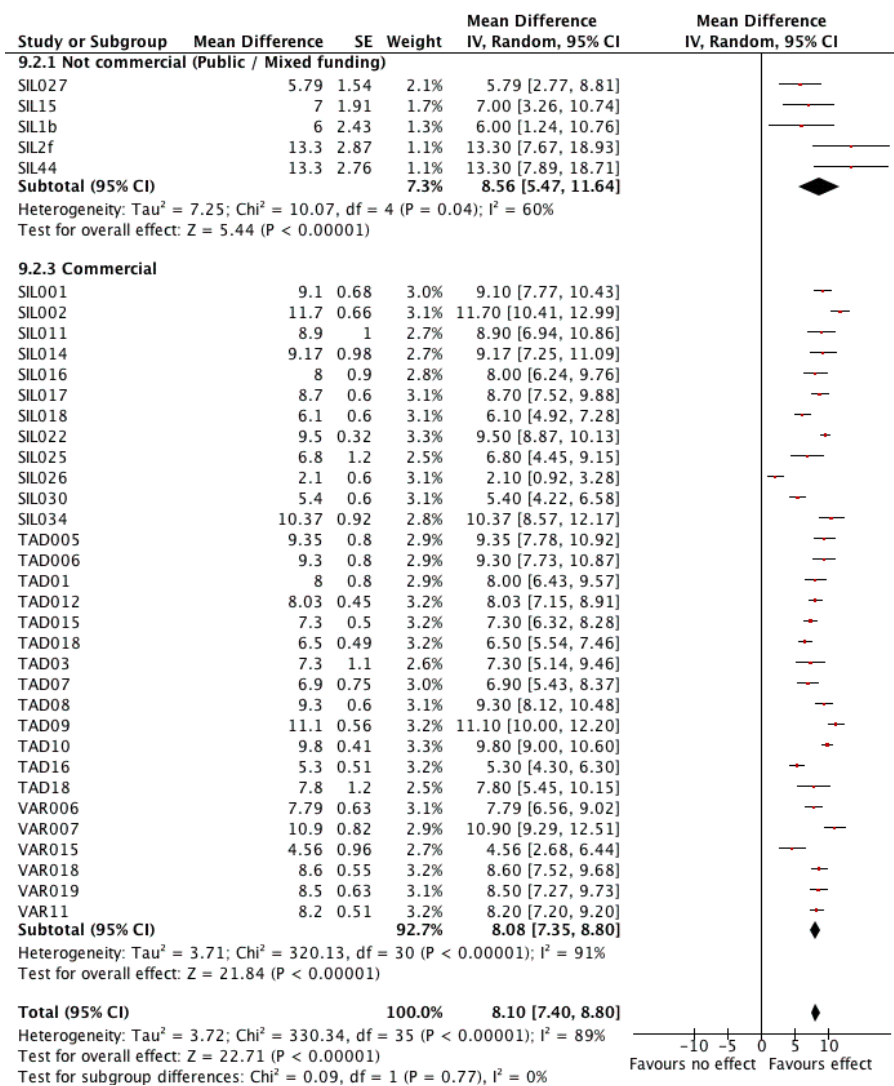

Forest plot of comparison: 9 IIEF-EF change scores: Commercial Funding, outcome: 9.2 Effect estimate intervention groups.

Figure 12 (Analysis 10.1)



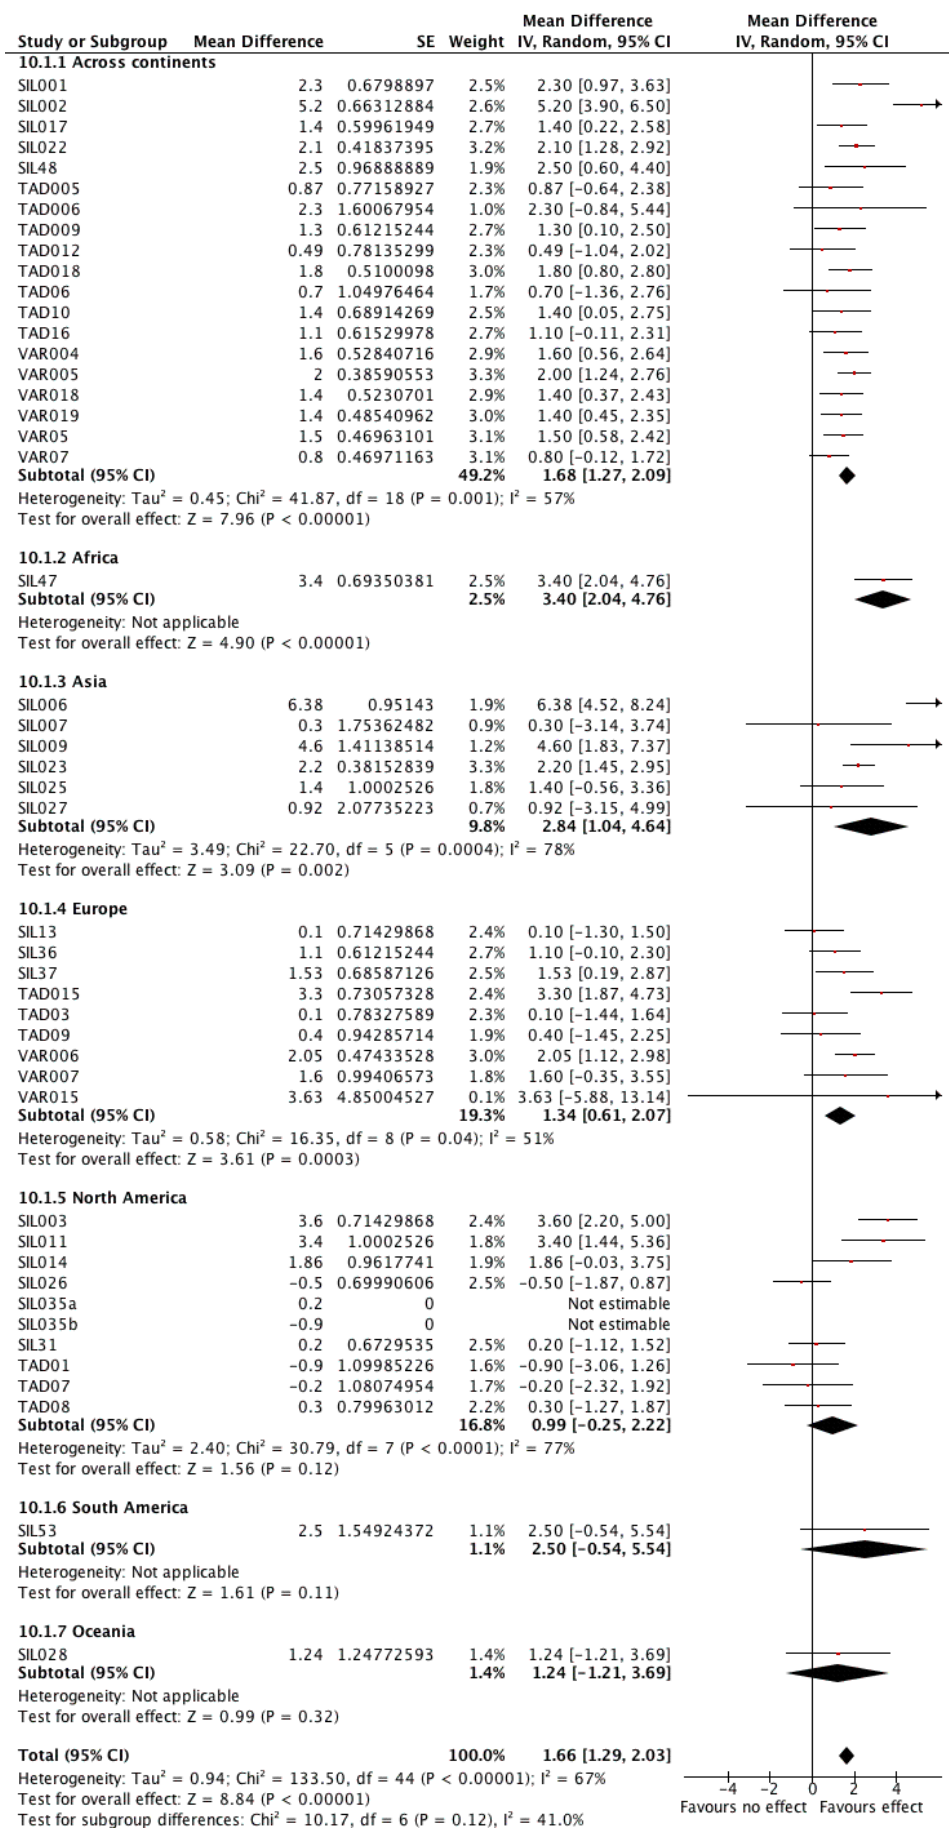

Forest plot of comparison: 10 IIEF-EF change scores: Continent, outcome: 10.1 Effect estimate placebo groups.

Figure 13 (Analysis 10.2)

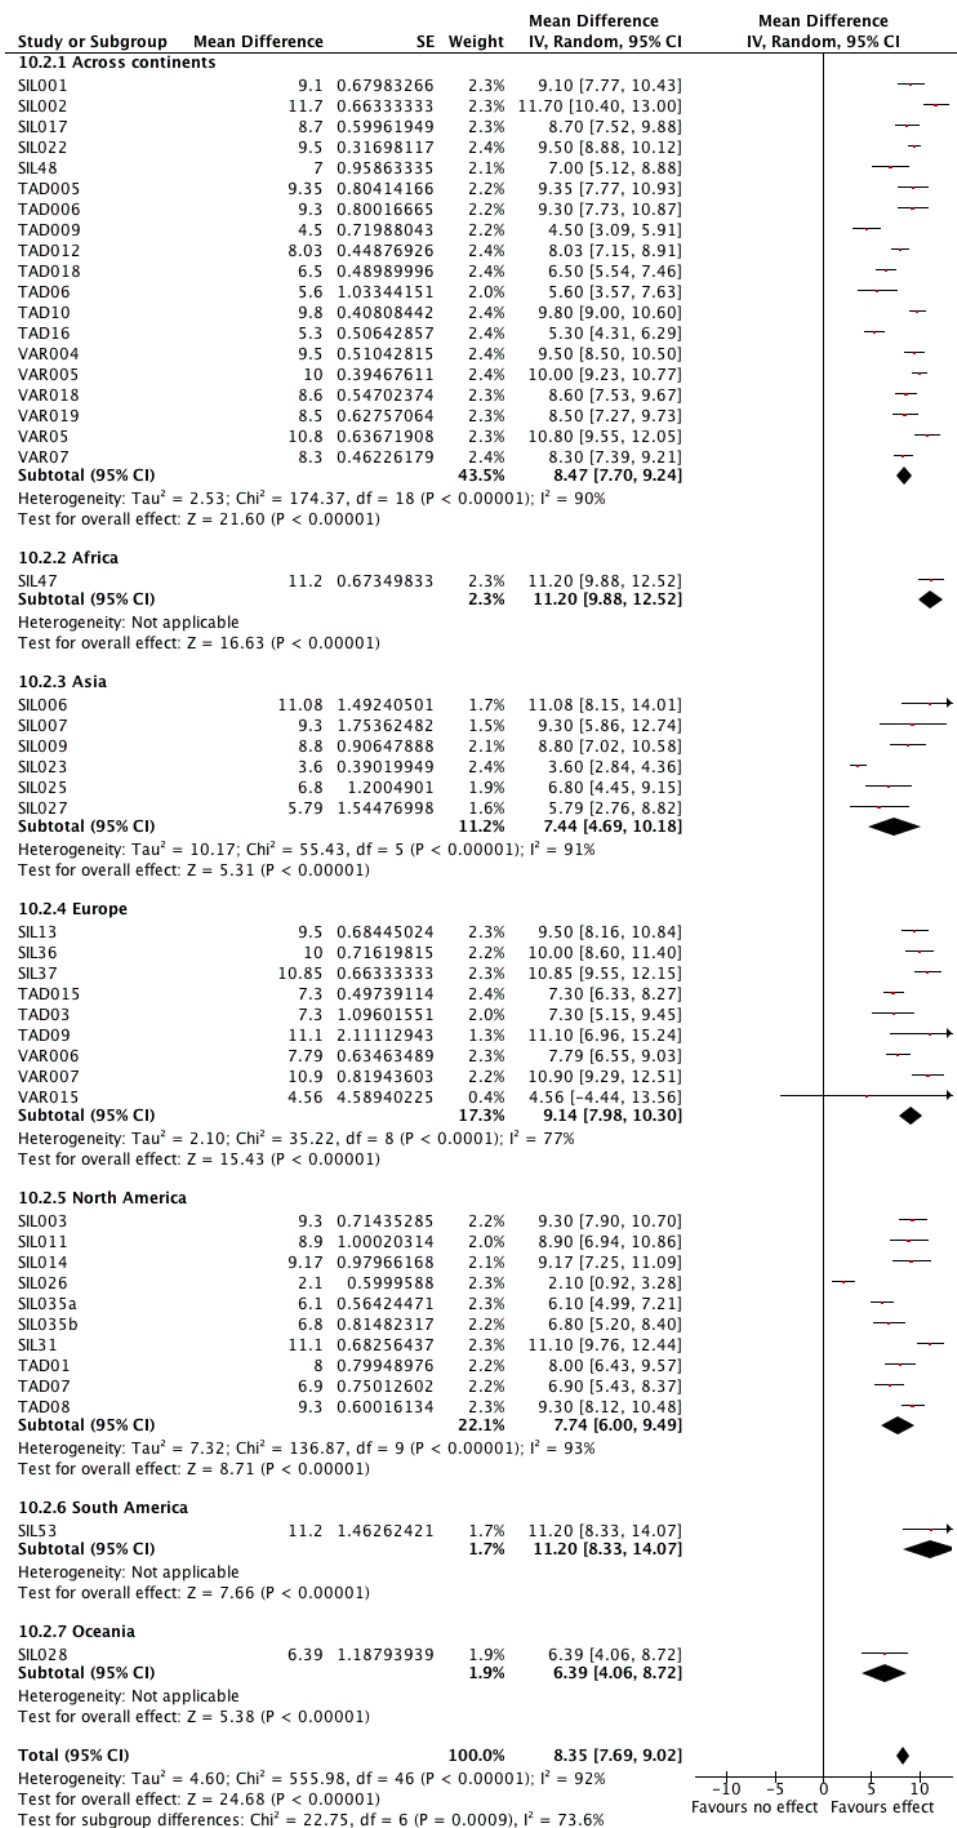

Forest plot of comparison: 10 IIEF-EF change scores: Continent, outcome: 10.2 Effect estimate intervention groups.

Figure 14 (Analysis 11.1)



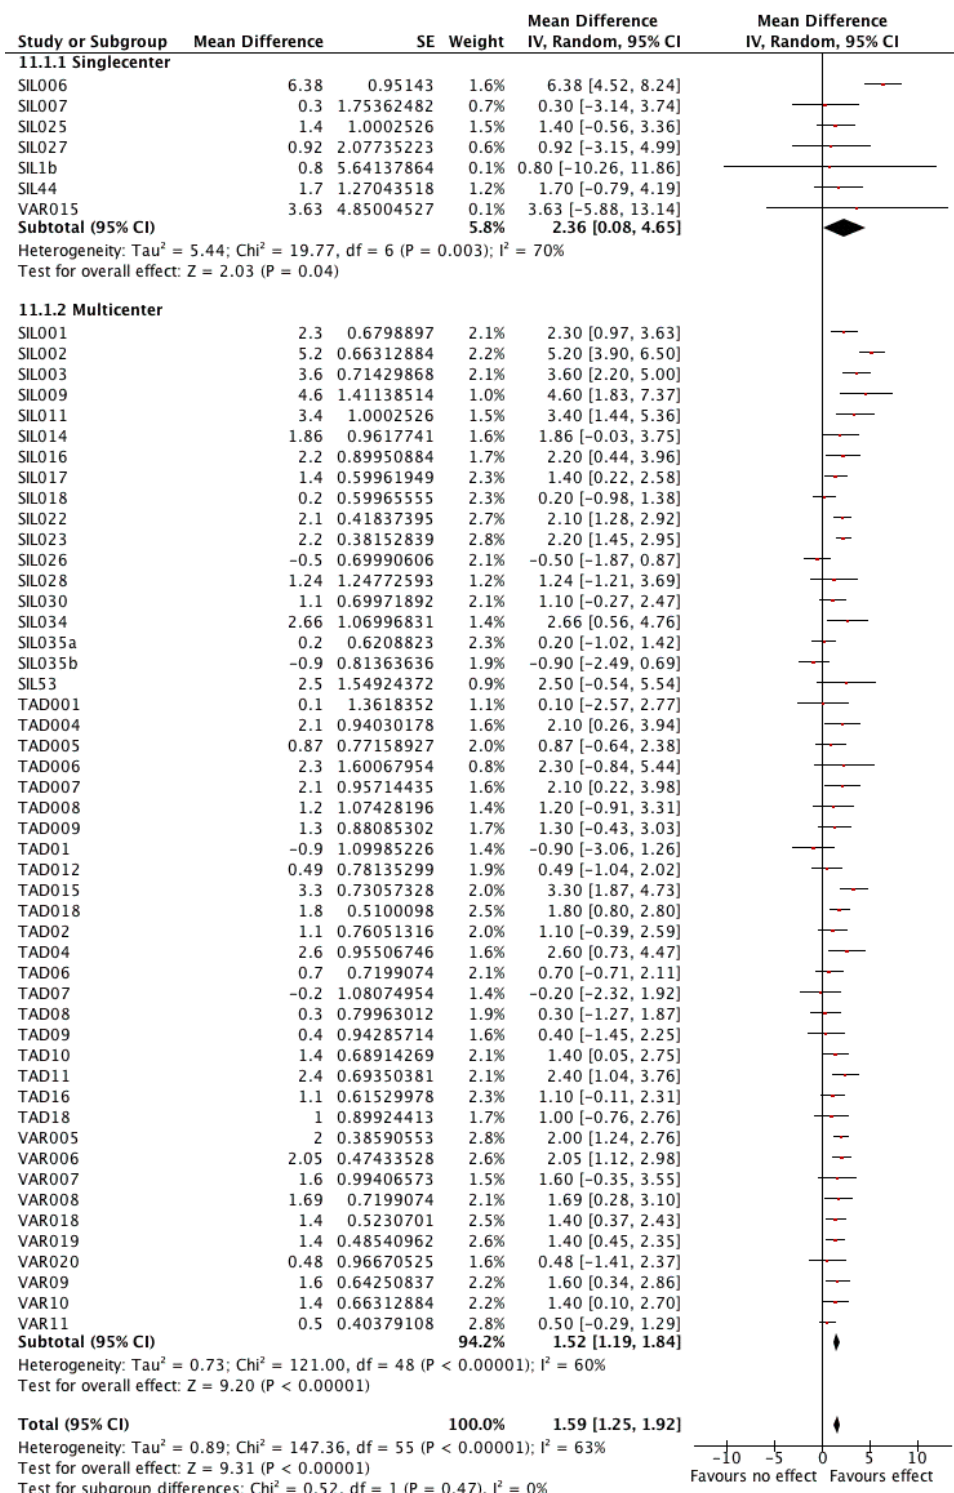

Forest plot of comparison: 11 IIEF-EF change scores: Single-center study, outcome: 11.1 Effect estimate placebo groups.

Figure 15 (Analysis 11.2)

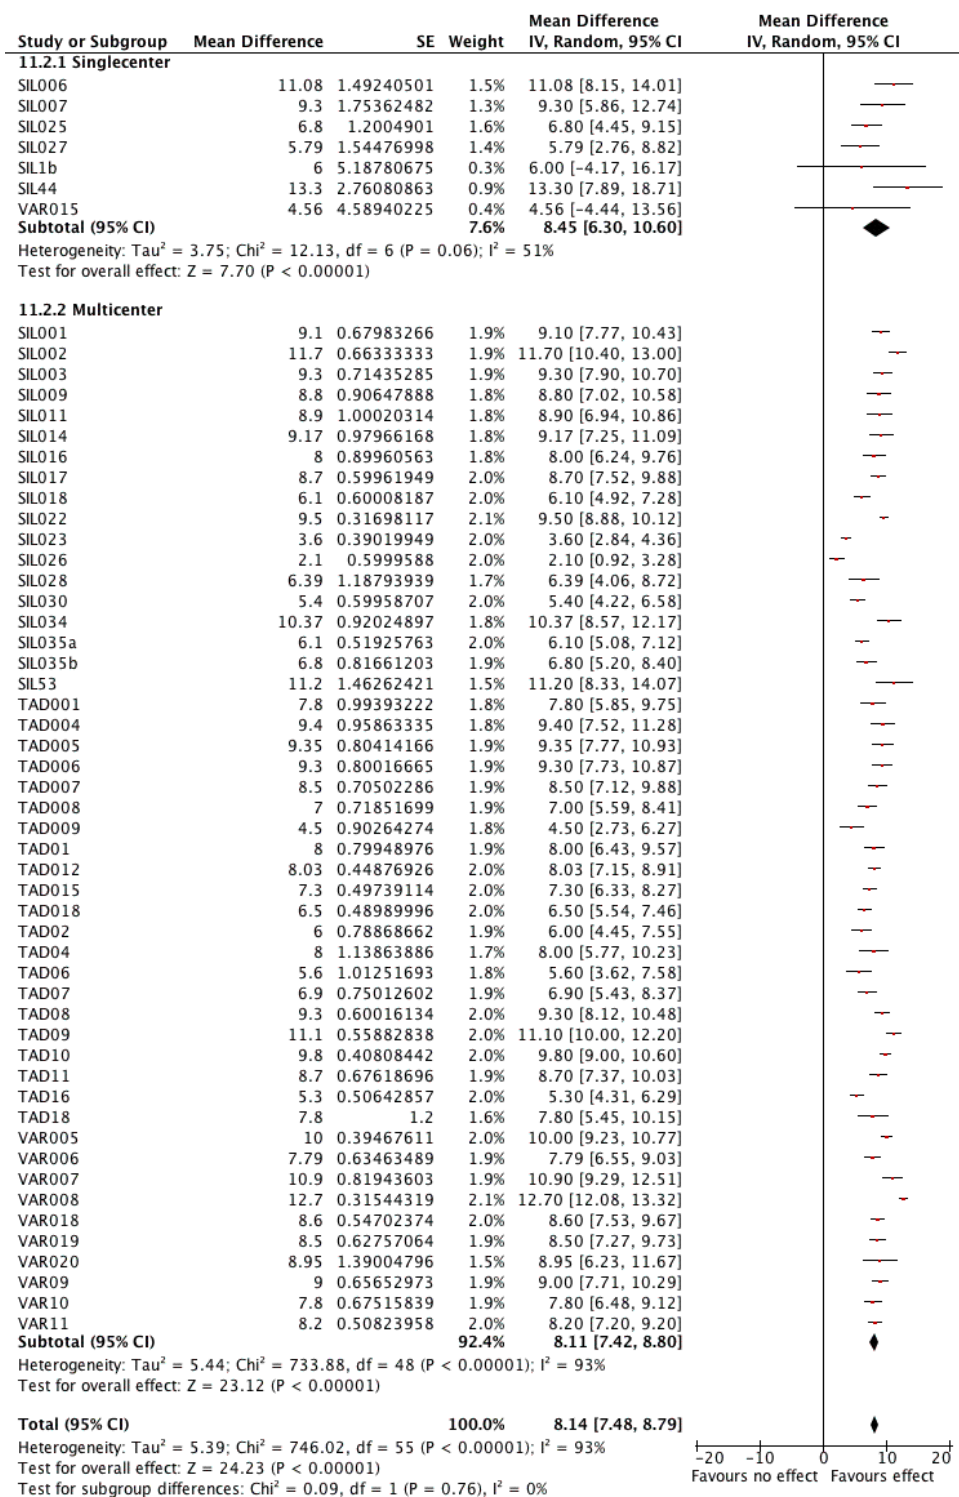

Forest plot of comparison: 11 IIEF-EF change scores: Single-center study, outcome: 11.2 Effect estimate intervention groups.

Figure 16 (Analysis 12.1)

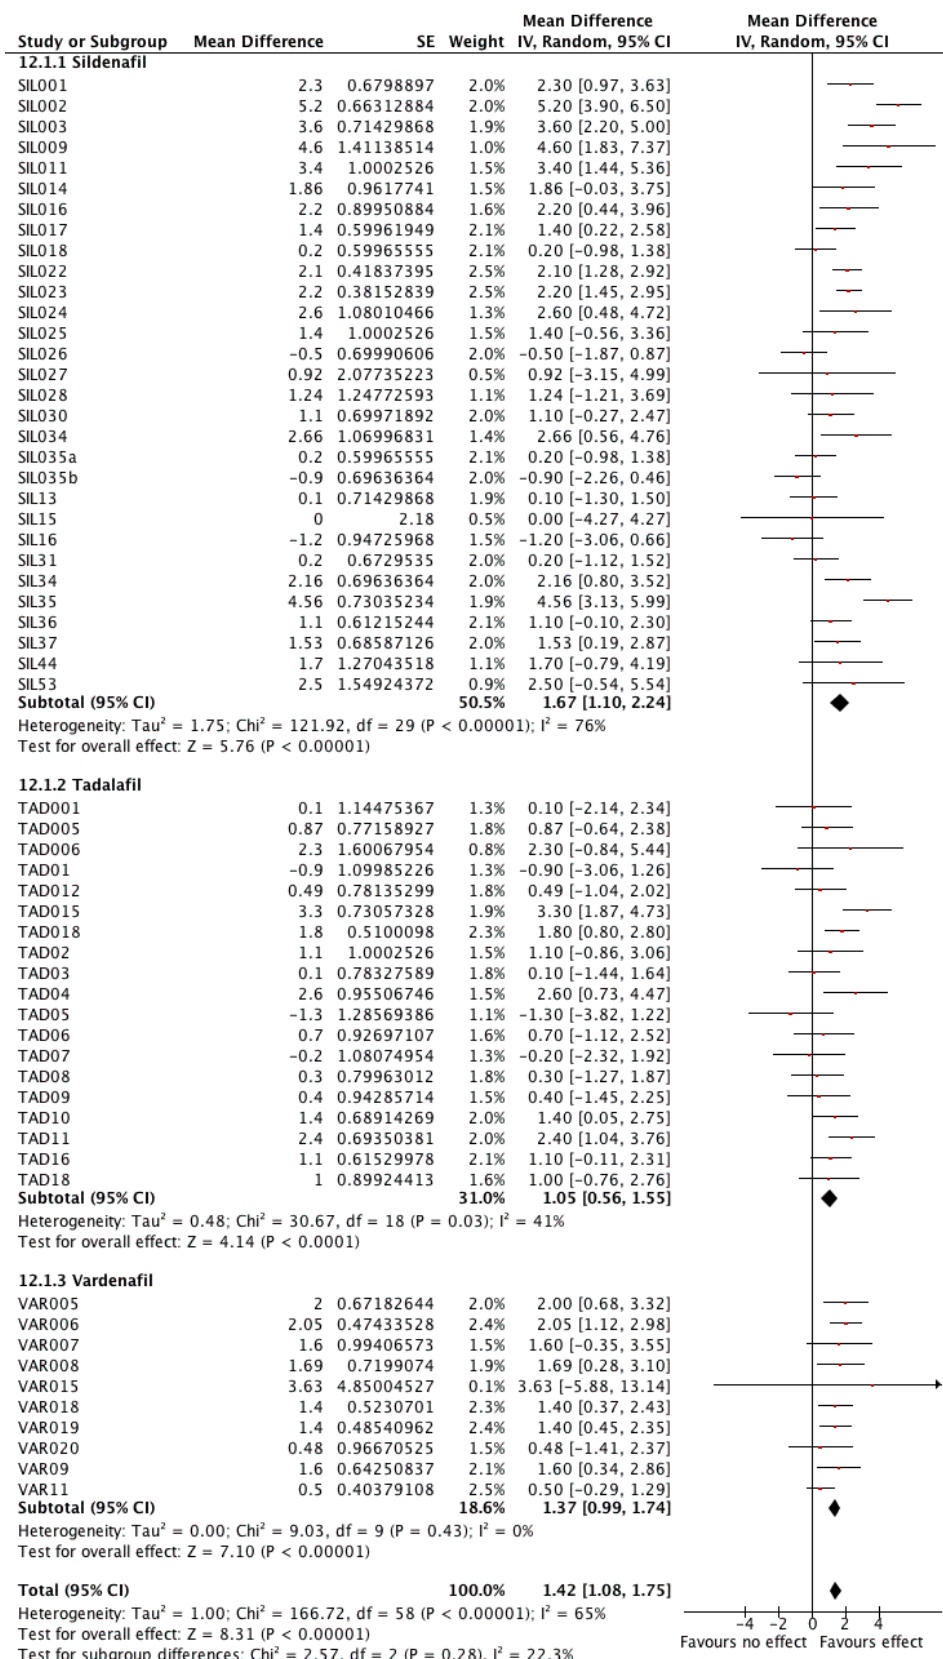

Forest plot of comparison: 12 IIEF-EF change scores: Type of PDE-5 inhibitor, outcome: 12.1 Effect estimate placebo groups.

Figure 17 (Analysis 12.2)

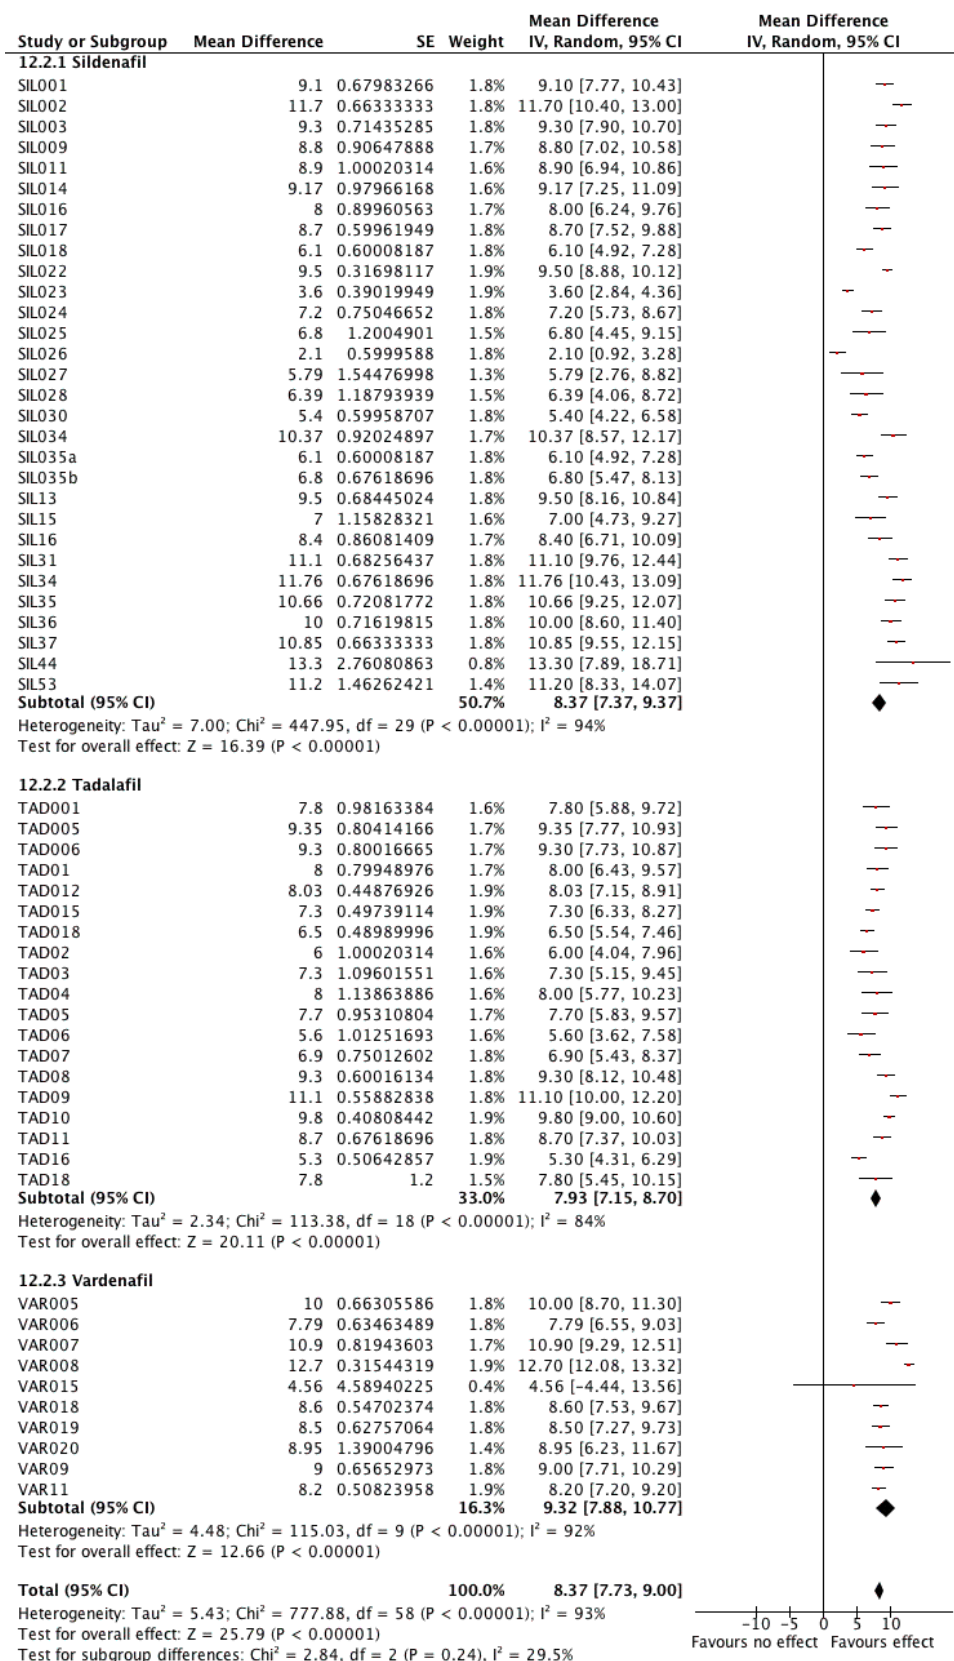

Forest plot of comparison: 12 IIEF-EF change scores: Type of PDE-5 inhibitor, outcome: 12.2 Effect estimate intervention groups.

Figure 18 (Analysis 13.1)

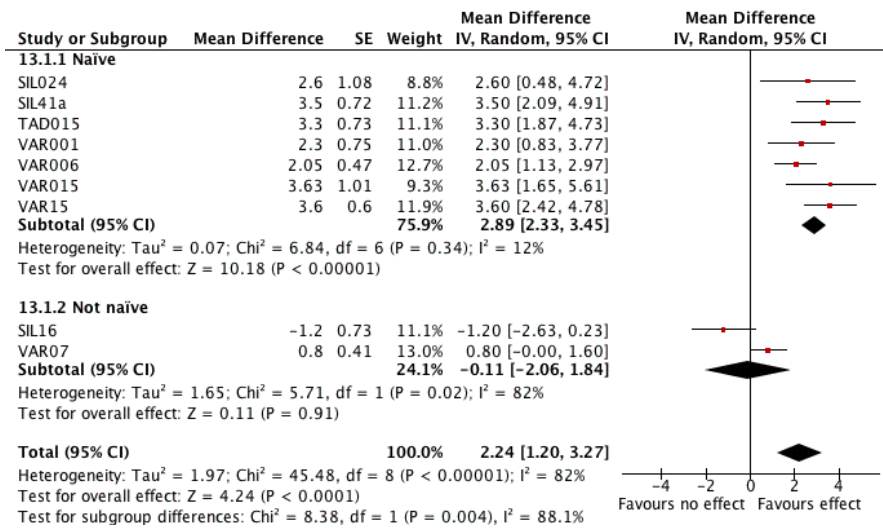

Forest plot of comparison: 13 IIEF-EF change scores: Prior experience with the intervention, outcome: 13.1 Effect estimate placebo groups.

Figure 19 (Analysis 13.2)

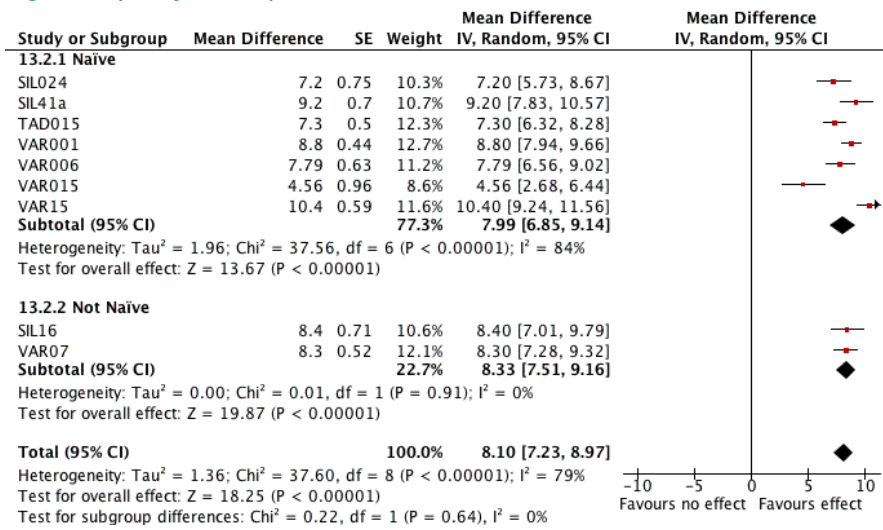

Forest plot of comparison: 13 IIEF-EF change scores: Prior experience with the intervention, outcome: 13.2 Effect estimate intervention groups.

## Sources of support

### Internal sources

- No sources of support provided

### External sources

- No sources of support provided

## Feedback

## Appendices
